# Supplementary material
Source: PubMed Central journal article supplement (PMC2998598)
Supplement: mmc1.pdf [file mmc1.pdf]

**Biophysical Journal, Volume 99**  
**Supplementary material**

**Coarse-grained Monte Carlo simulations of mucus: structure, dynamics and thermodynamics**

Pawel Gniewek , Andrzej Kolinski \*

Laboratory of Theory of Biopolymers, Faculty of Chemistry, University of Warsaw, Pasteura 1, 02-093  
Warsaw, Poland

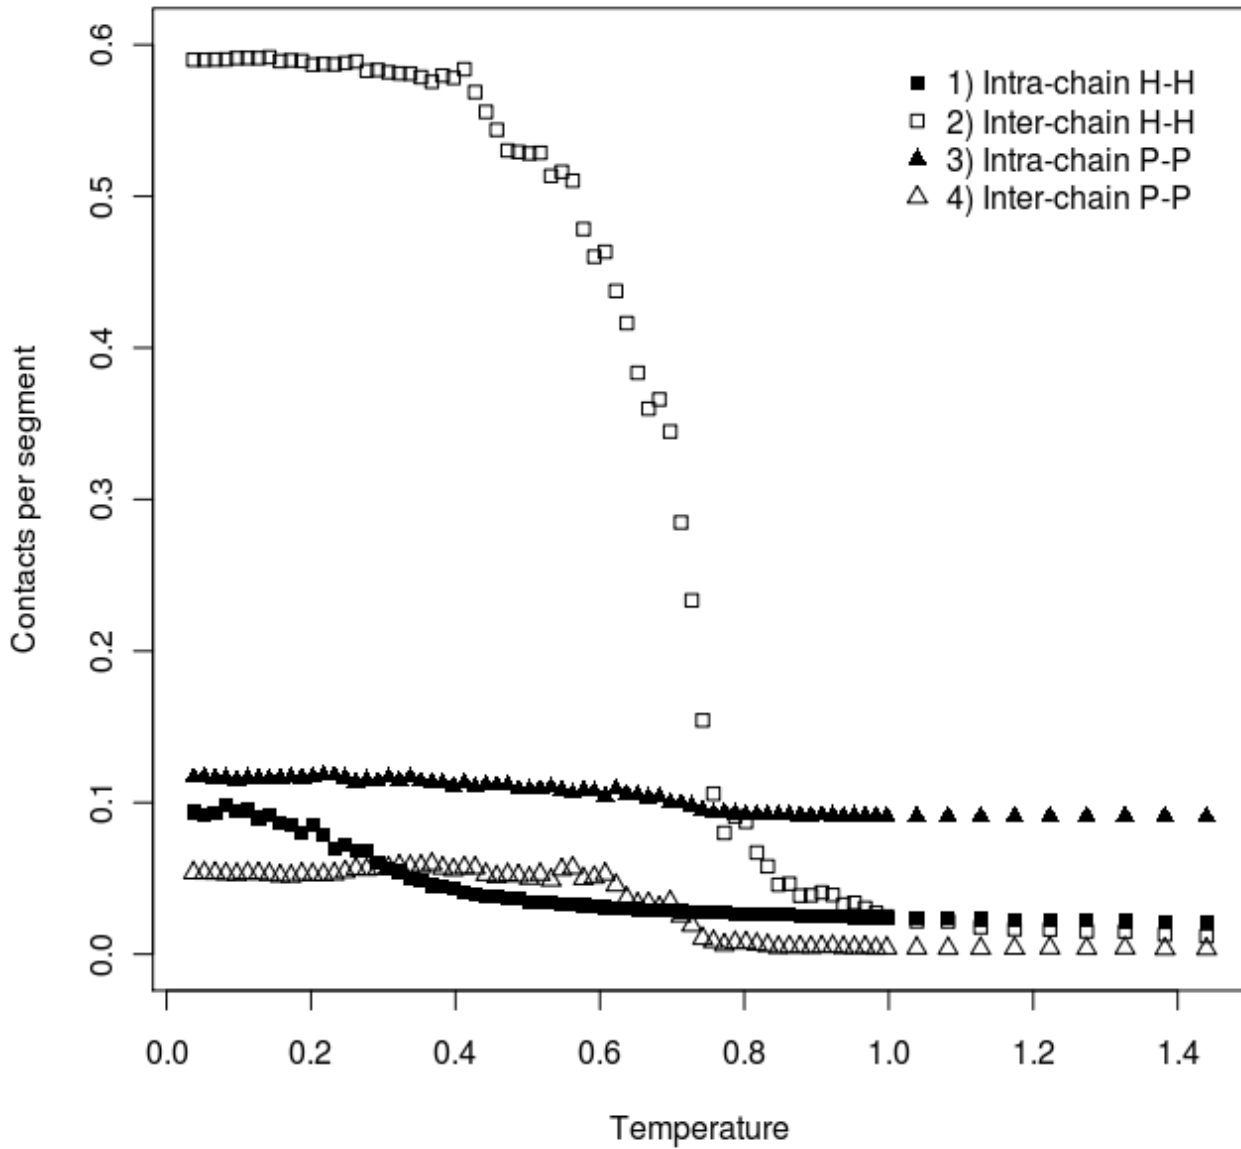

**Fig.S1.** Changes of the number of interactions per chain segment (see Methods) with temperature for System II at concentration of mucins  $C=5\%$ . Solid symbols denote intra-chain interaction, open inter-chain.

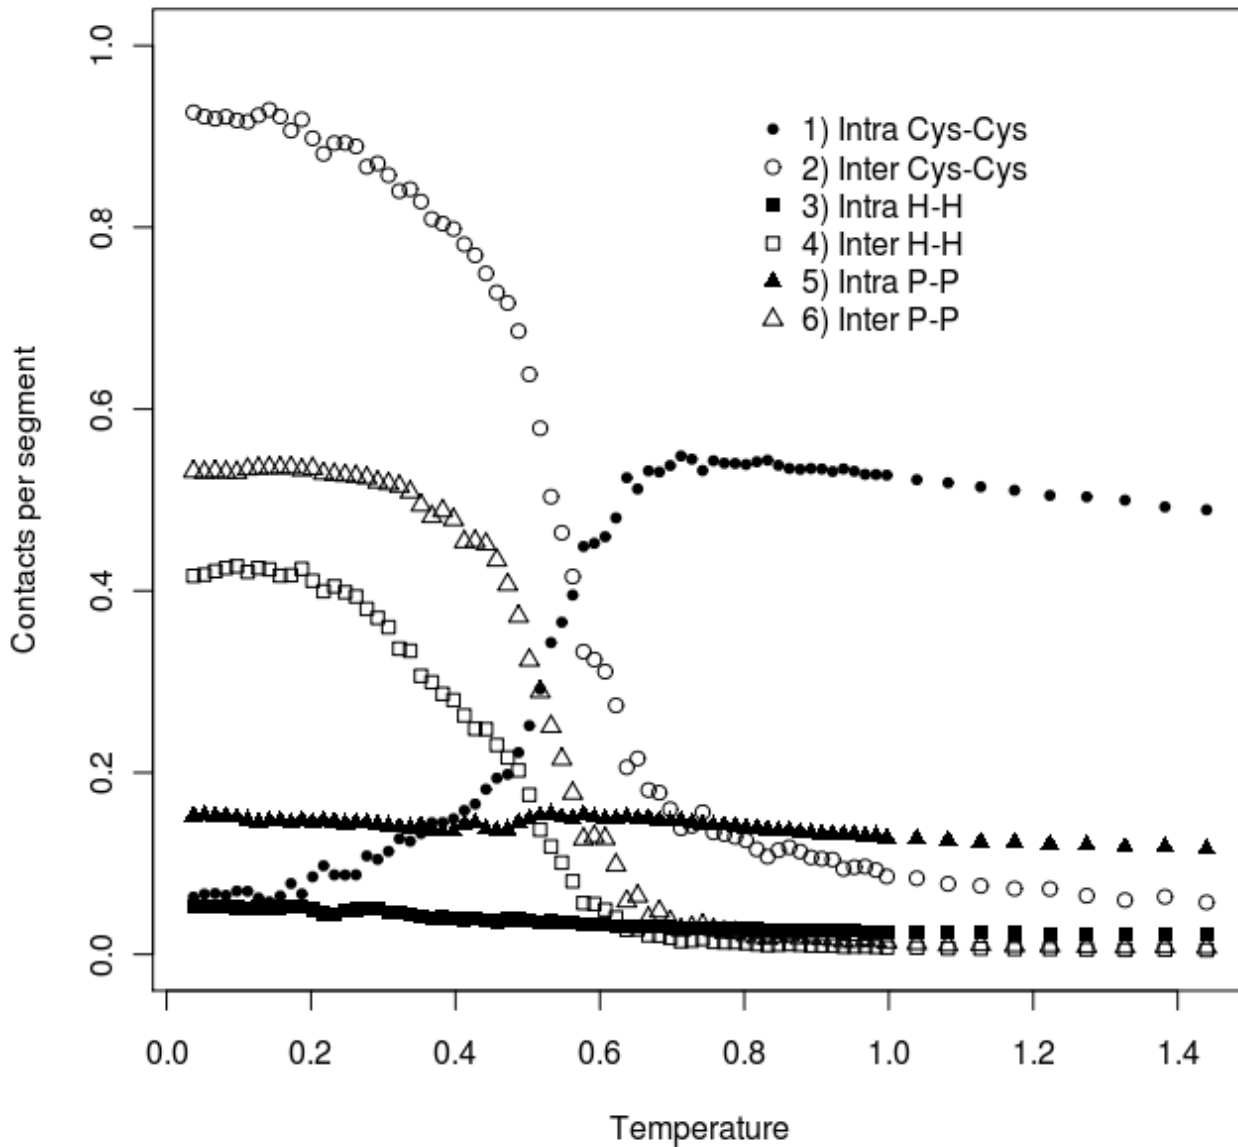

**Fig.S2.** Changes of the number of interactions per chain segment (see Methods) with temperature for System IV at concentration of mucins  $C=5\%$ . Solid symbols denote intra-chain interaction, open inter-chain.

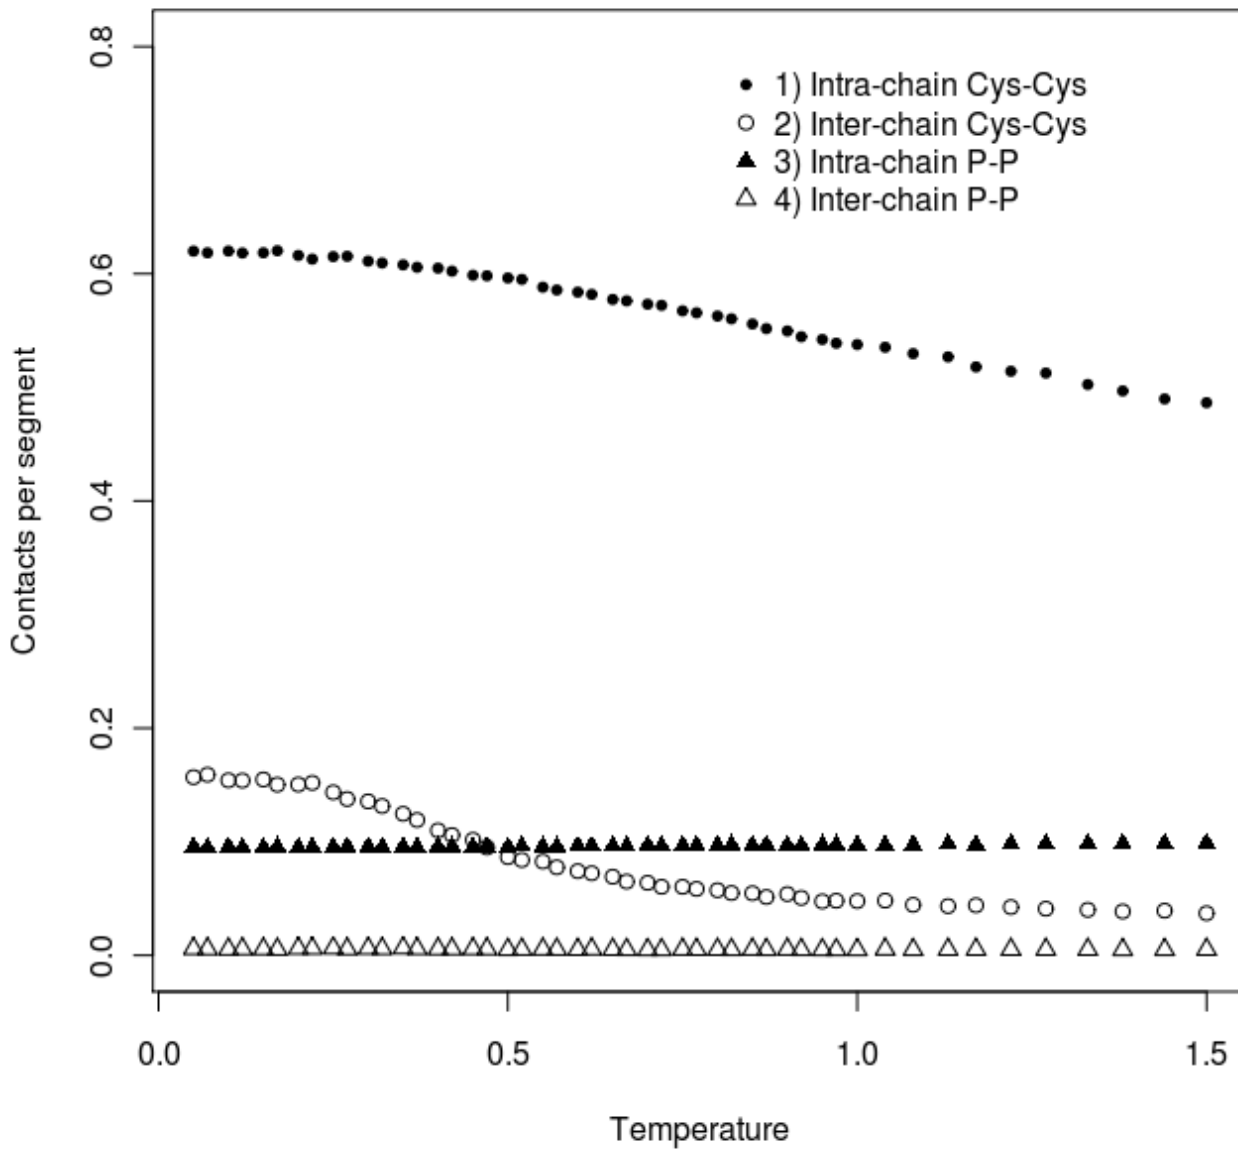

**Fig.S3.** Changes of the number of interactions per chain segment (see Methods) with temperature for System **III** at concentration of mucins  $C=5\%$ . Solid symbols denote intra-chain interaction, open inter-chain.

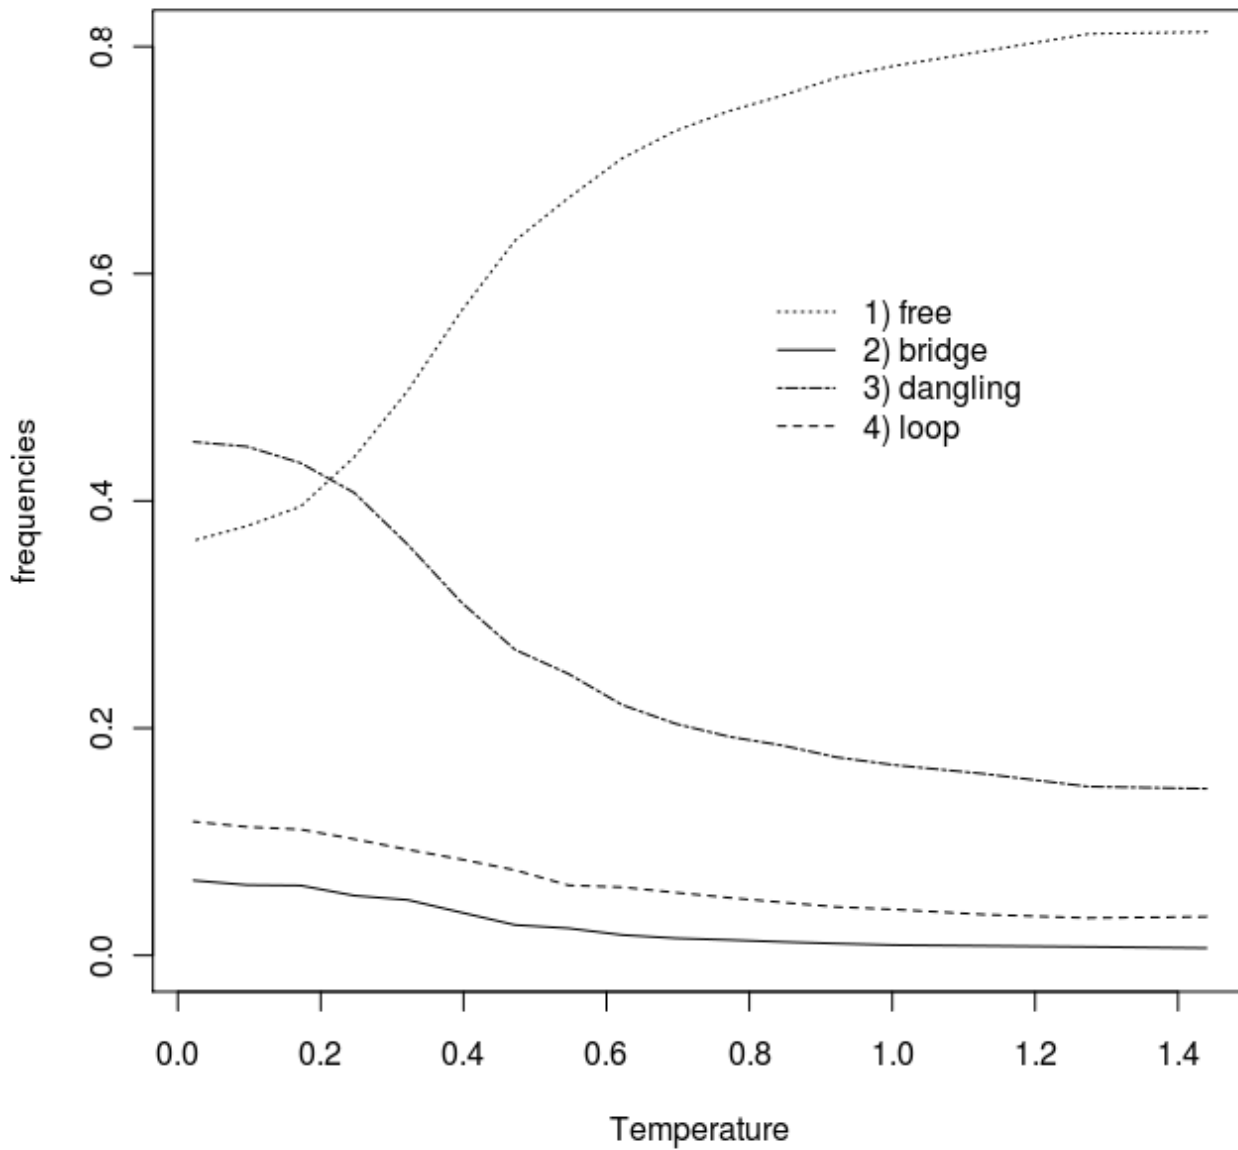

**Fig.S4.** Changes of the frequencies of various topologies of chain interactions (see Methods) with temperature for System **III** at concentration of mucins  $C=5\%$ .

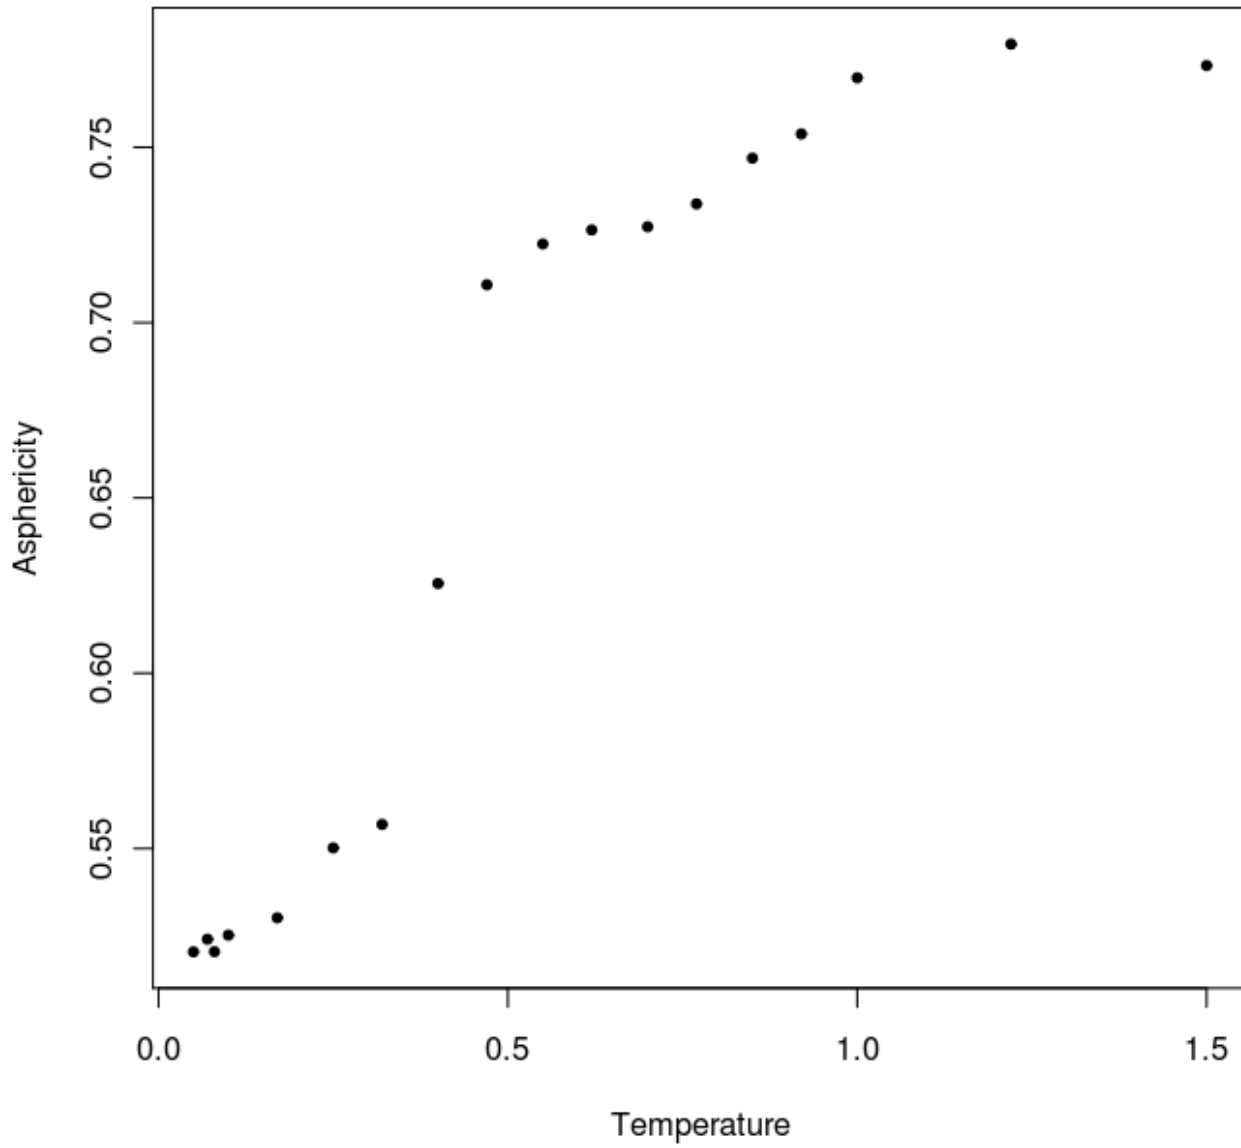

**Fig.S5A.** Changes of asphericity(see Methods) for the System I with temperature. Concentration of mucins is equal C=5%.

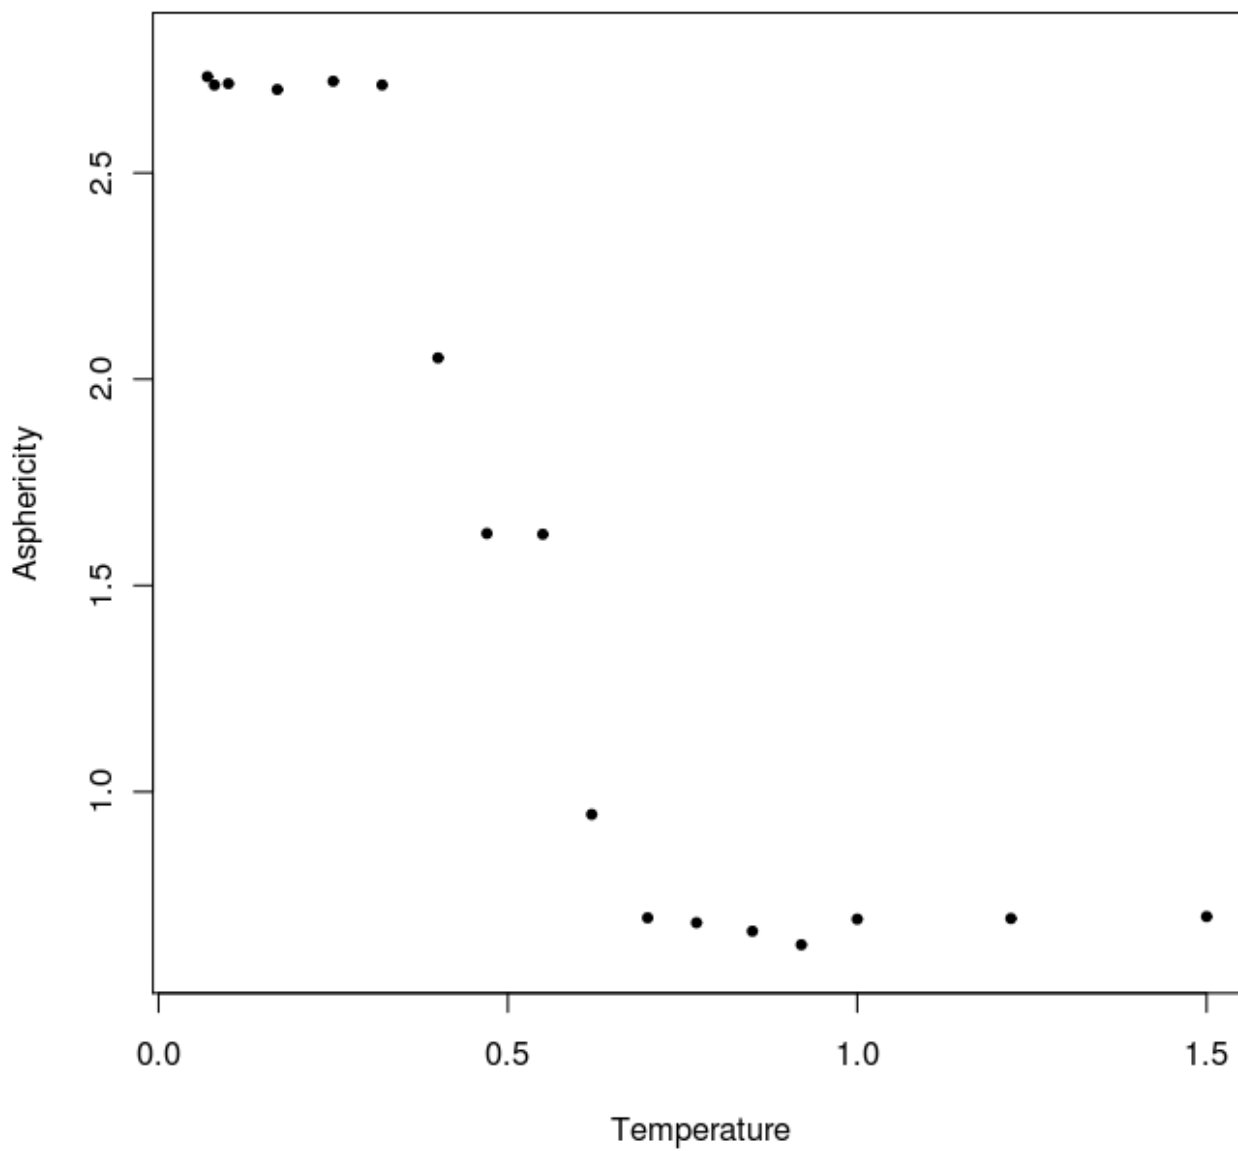

**Fig.S5B.** Changes of asphericity(see Methods) for the System **IV** with temperature. Concentration of mucins is equal  $C=5\%$ .

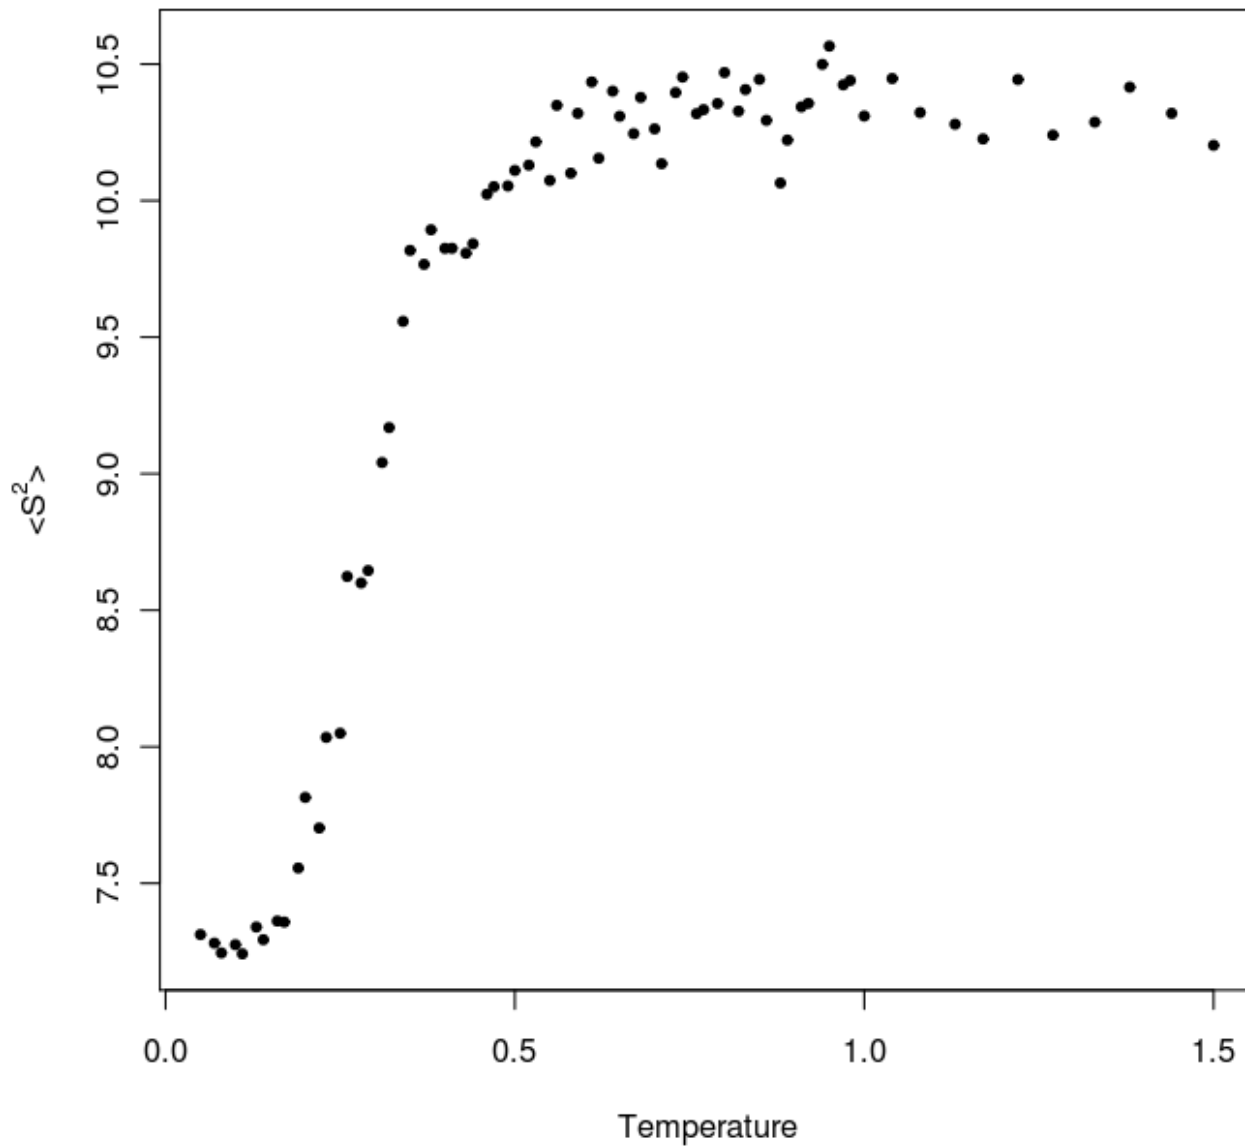

**Fig.S6.** Mean-square radius of gyration of entire mucin chain as a function of temperature. Concentration of the System **I** is equal  $C=5\%$ . Radius of gyration is expressed in Cartesian units (1 lattice unit =  $\sqrt{2}$  Cartesian units).



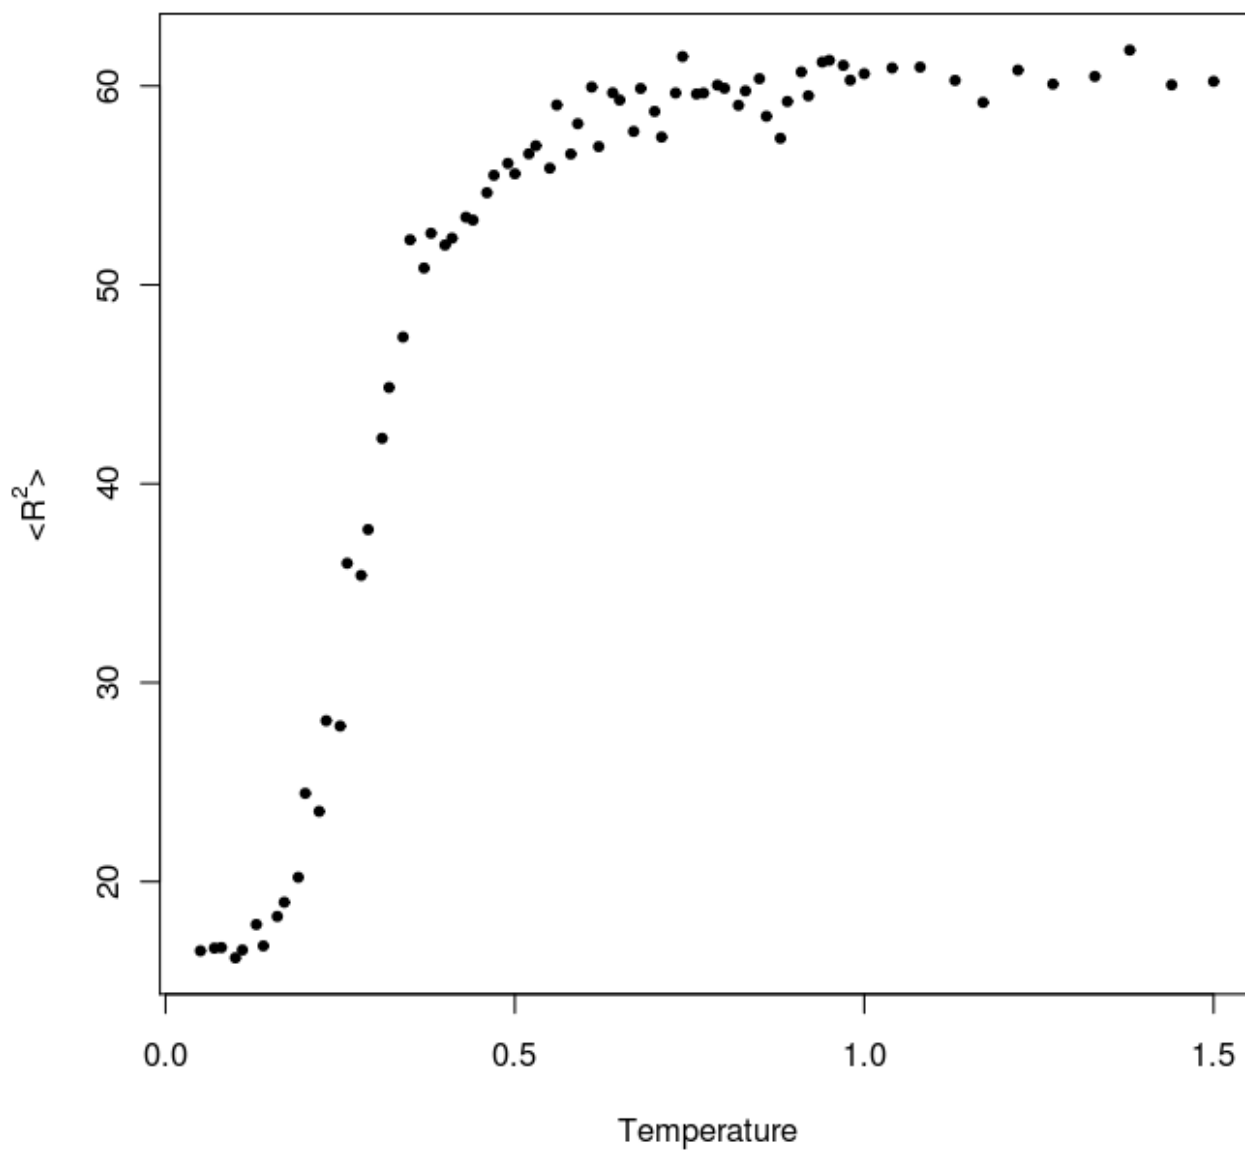

**Fig.S7.** Mean-square end-to-end distance of entire mucin chain as a function of temperature. Concentration of the System **I** is equal  $C=5\%$ . End-to-end distance is expressed in Cartesian units (1 lattice unit =  $\sqrt{2}$  Cartesian units).

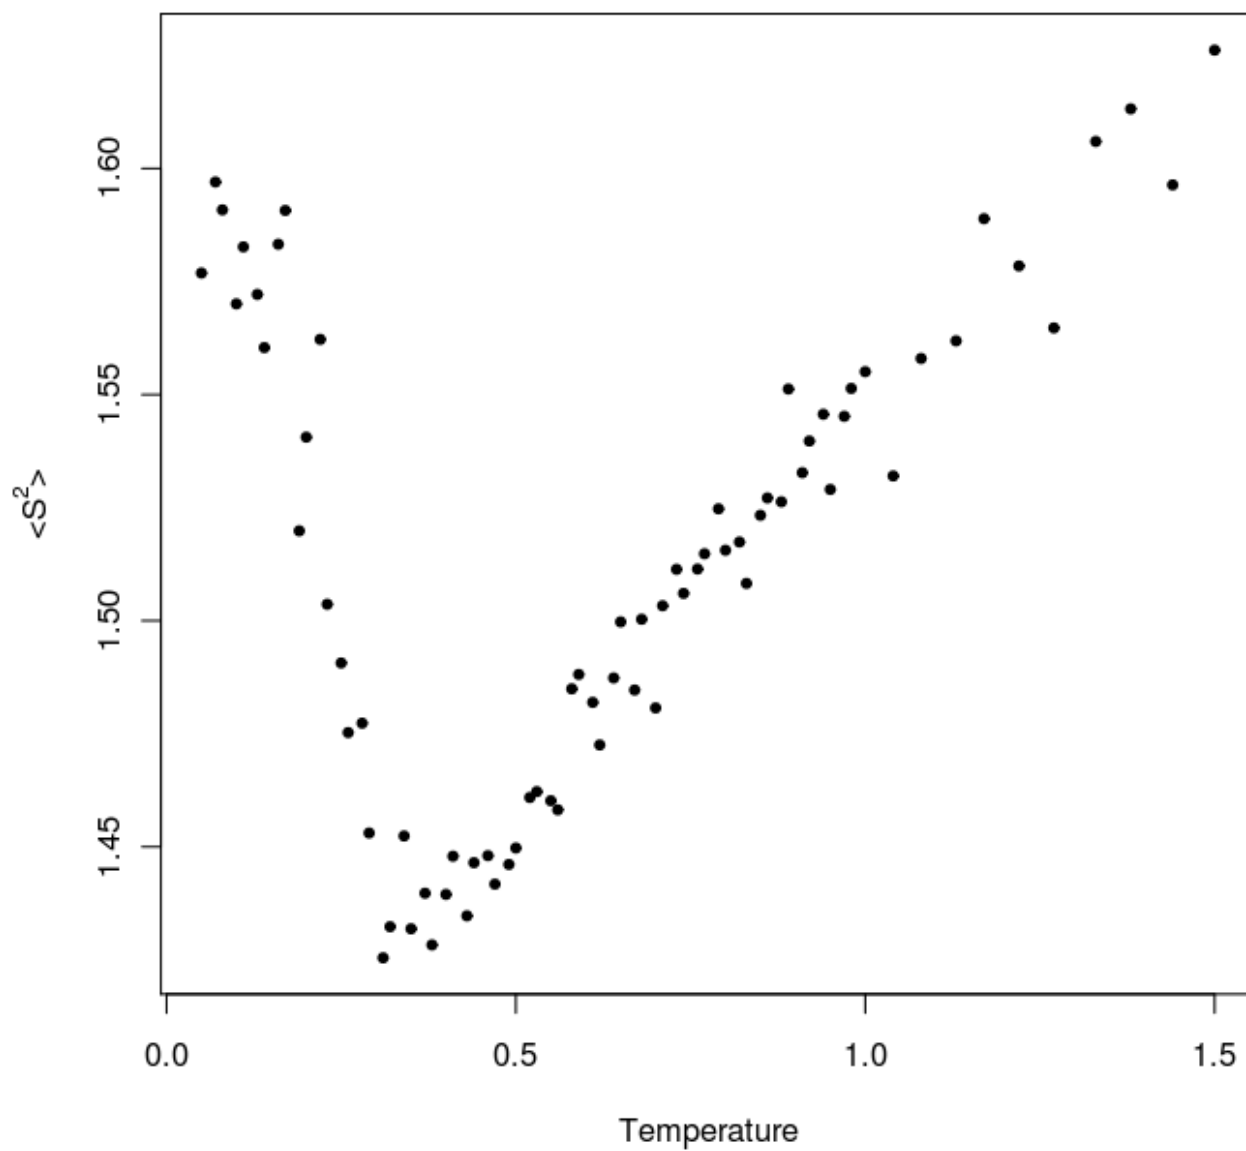

**Fig.S8.** Mean-square radius of gyration of the longer (positions form 1 to 5 in a mucin chain) hydrophobic sub-chain as a function of temperature. Concentration of the System I is equal  $C=5\%$ . Radius of gyration is expressed in Cartesian units (1 lattice unit =  $\sqrt{2}$  Cartesian units).

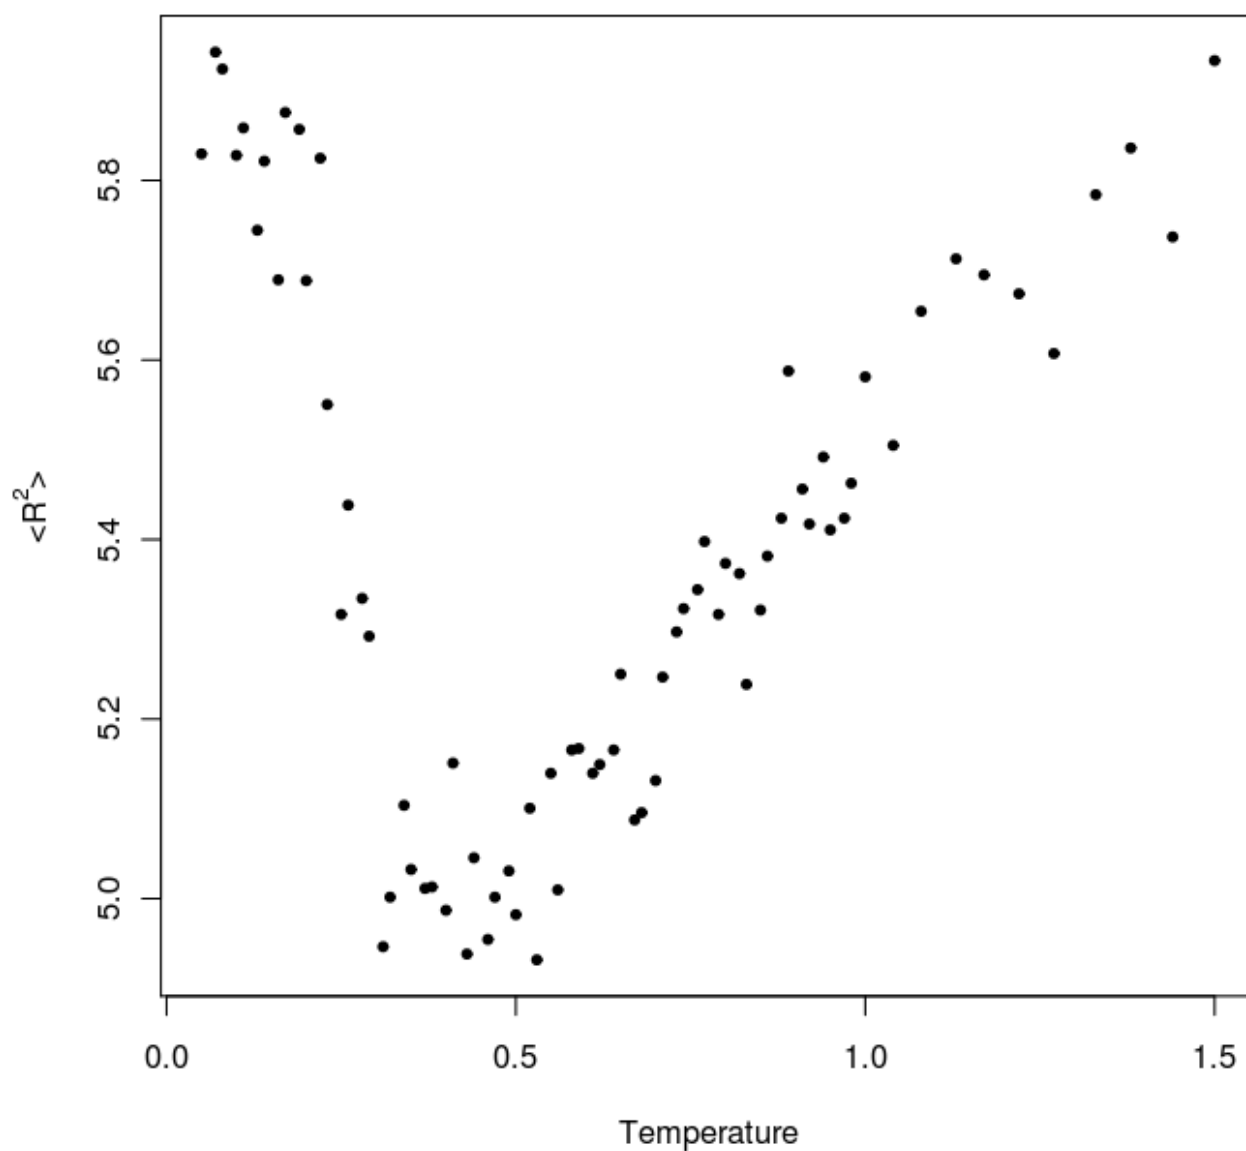

**Fig.S9.** Mean-square end-to-end distance of the longer (positions form 1 to 5 in a mucin chain) hydrophobic sub-chain as a function of temperature. Concentration of the System **I** is equal C=5%. End-to-end distance is expressed in Cartesian units (1 lattice unit =  $\sqrt{2}$  Cartesian units).

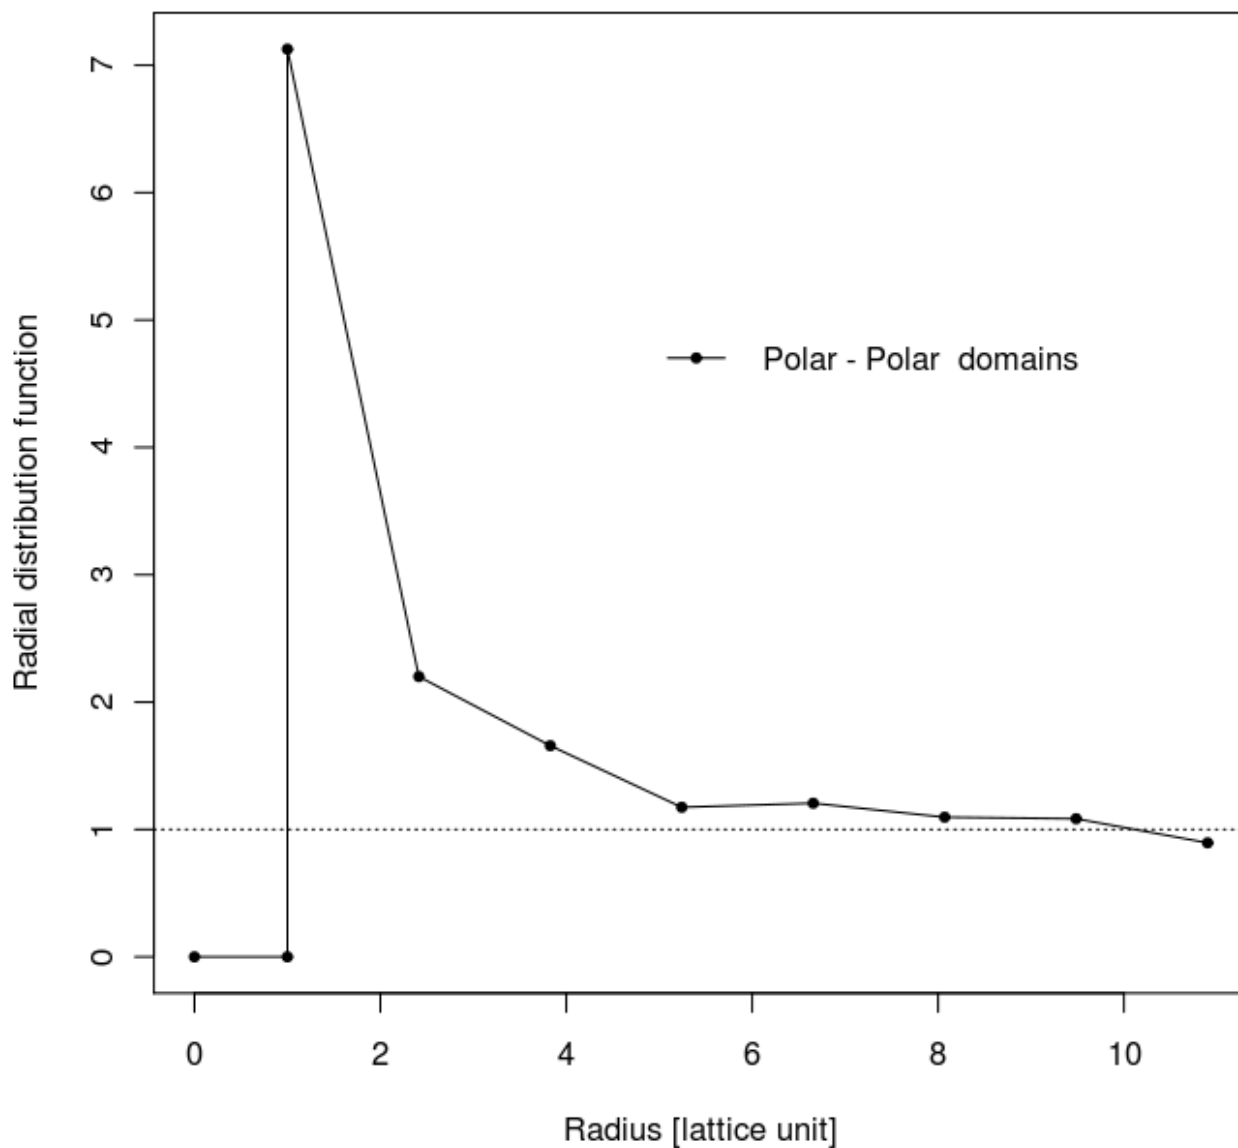

**Fig.S10.** Radial distribution function (RDF) for polar domains at temperature  $T=0.2$  for System I at concentration of mucins  $C=5\%$ . RDF equal to 1.0 means uniform, random distribution. One lattice unit corresponds to about 25nm in the real system.

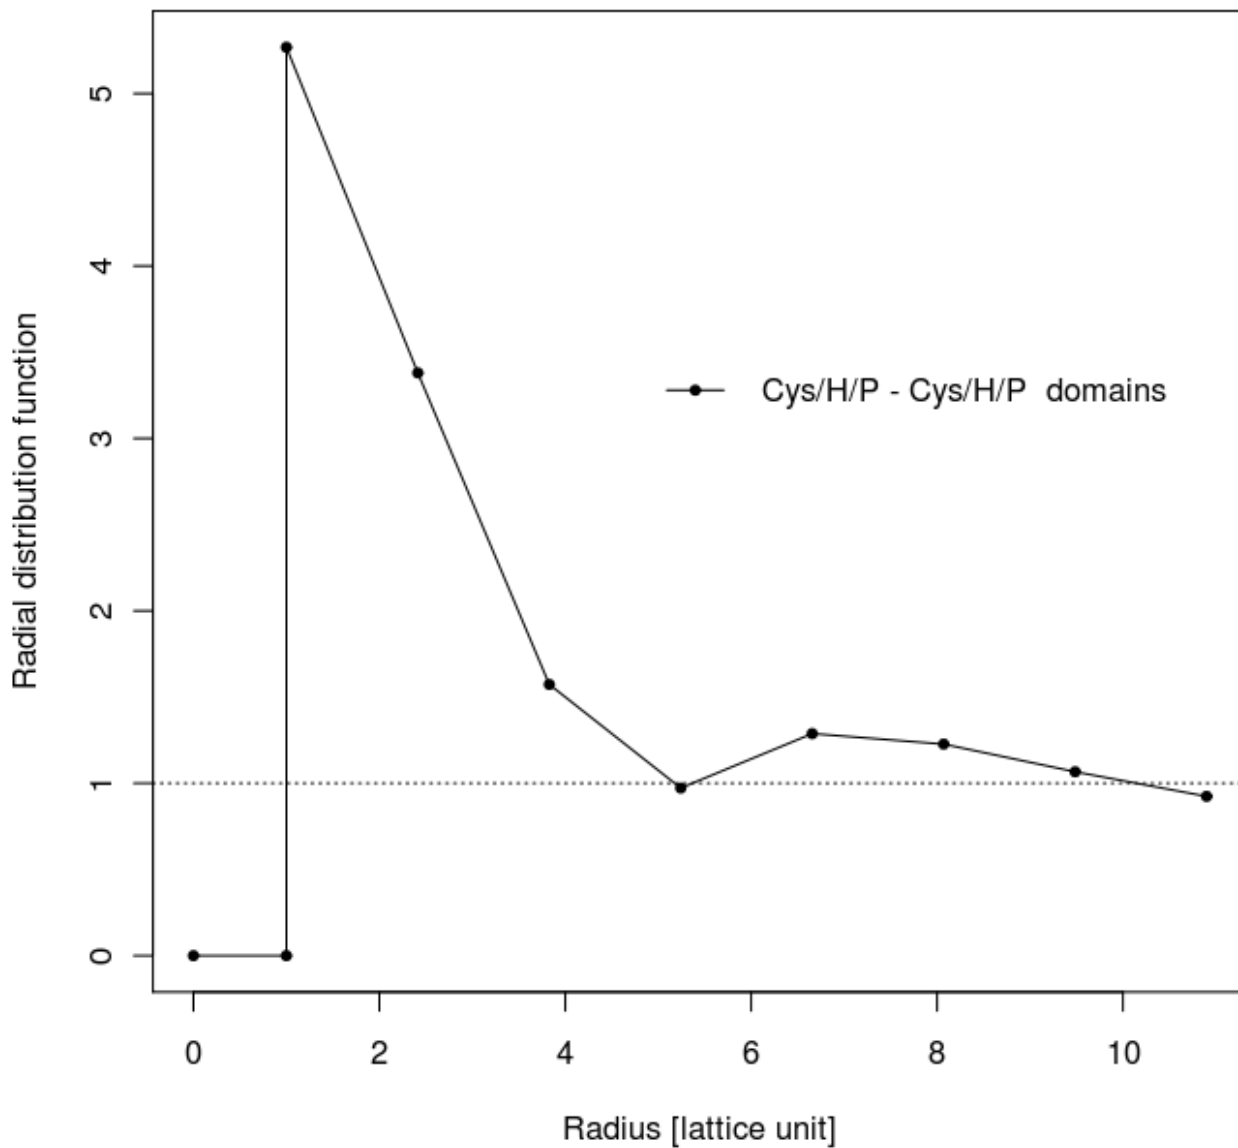

**Fig.S11.** Radial distribution function (RDF) for all domains at temperature  $T=0.2$  for System **I** at concentration of mucins  $C=5\%$ . RDF equal to 1.0 means uniform, random distribution. One lattice unit corresponds to about 25nm in the real system.

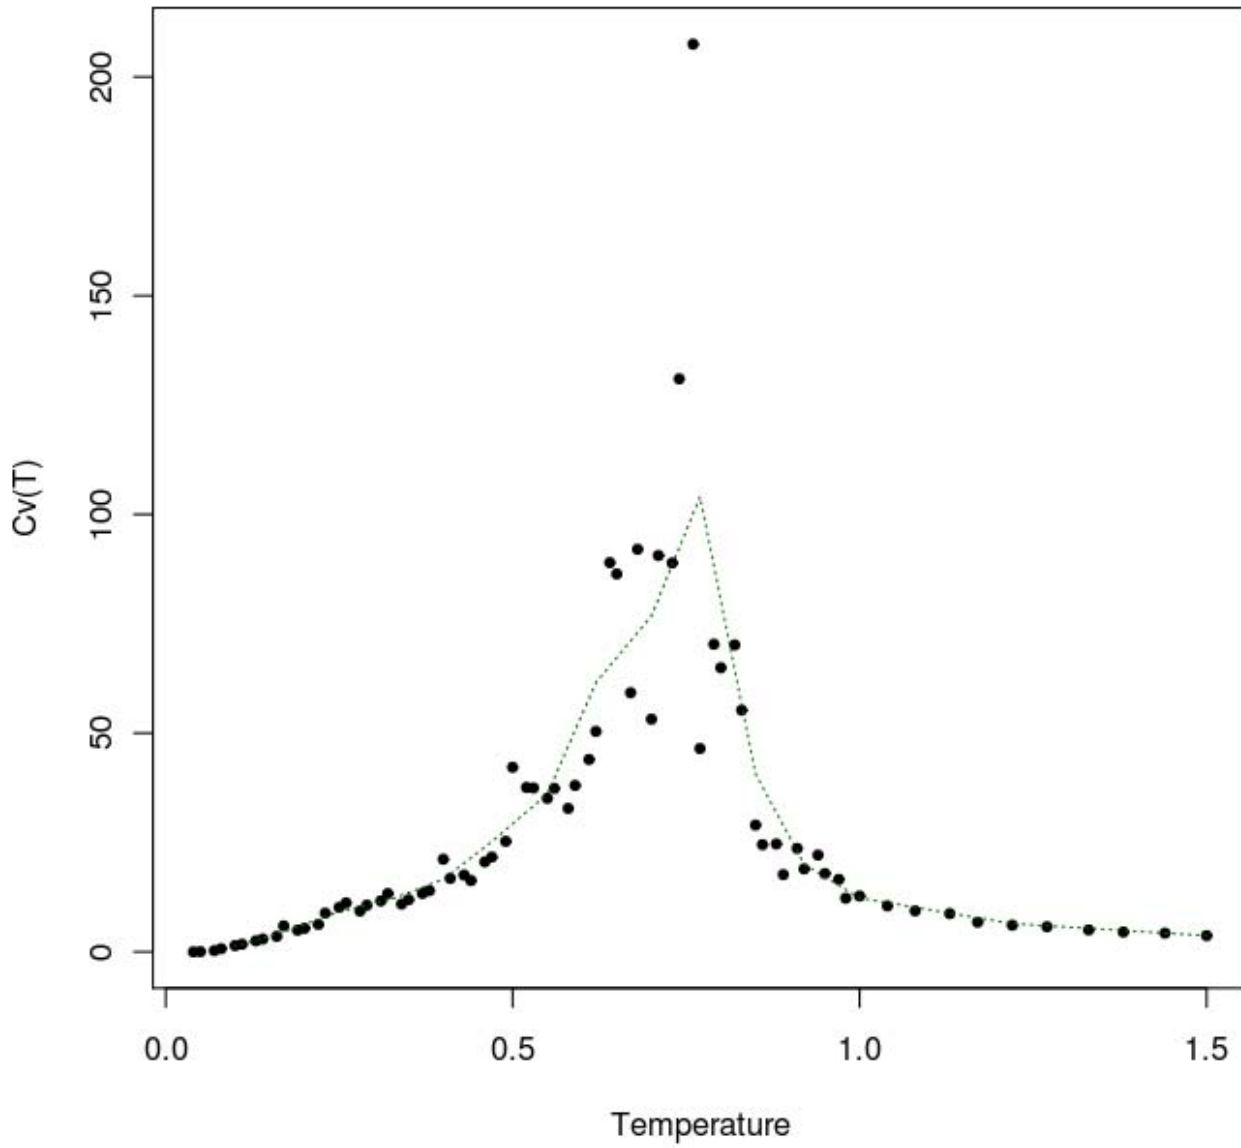

**Fig.S12.** Heat capacity as a function of temperature for concentration of mucins  $C=5\%$  and System II. The dotted line represents smoothed data obtained by averaging of 5 consecutive black filled circles. The transition temperature is about 0.77.

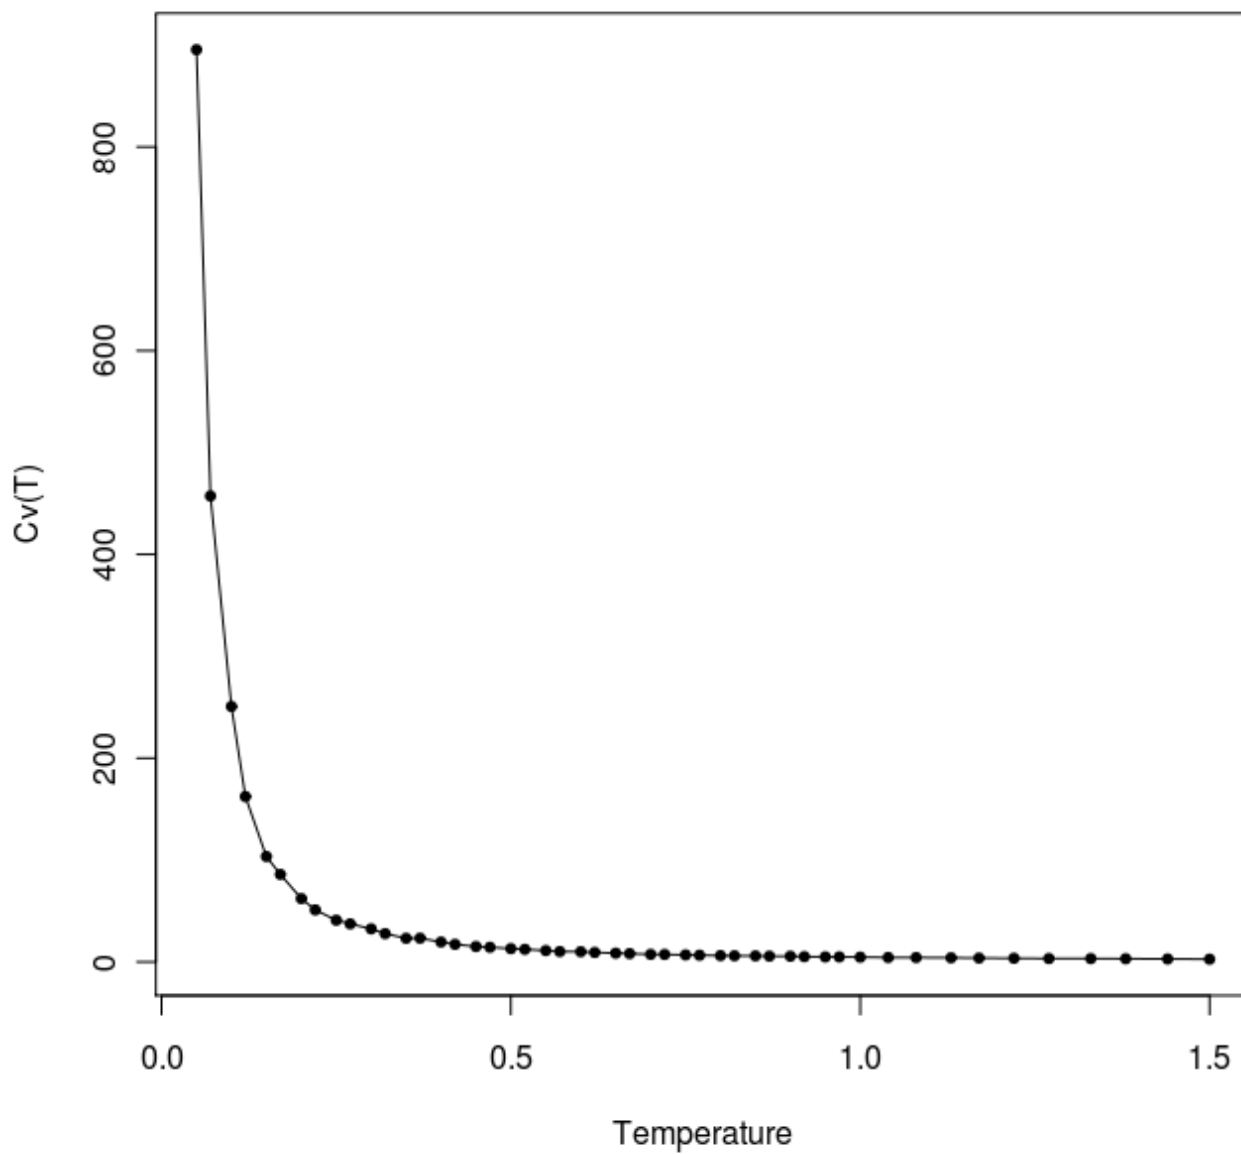

**Fig.S13.** Heat capacity as a function of temperature for concentration of mucins  $C=5\%$  and System **III**. The peak near  $T=0.0$  is caused by numerical issues (dividing dispersion of energy by  $T^2$ ), not by sol-gel transition.

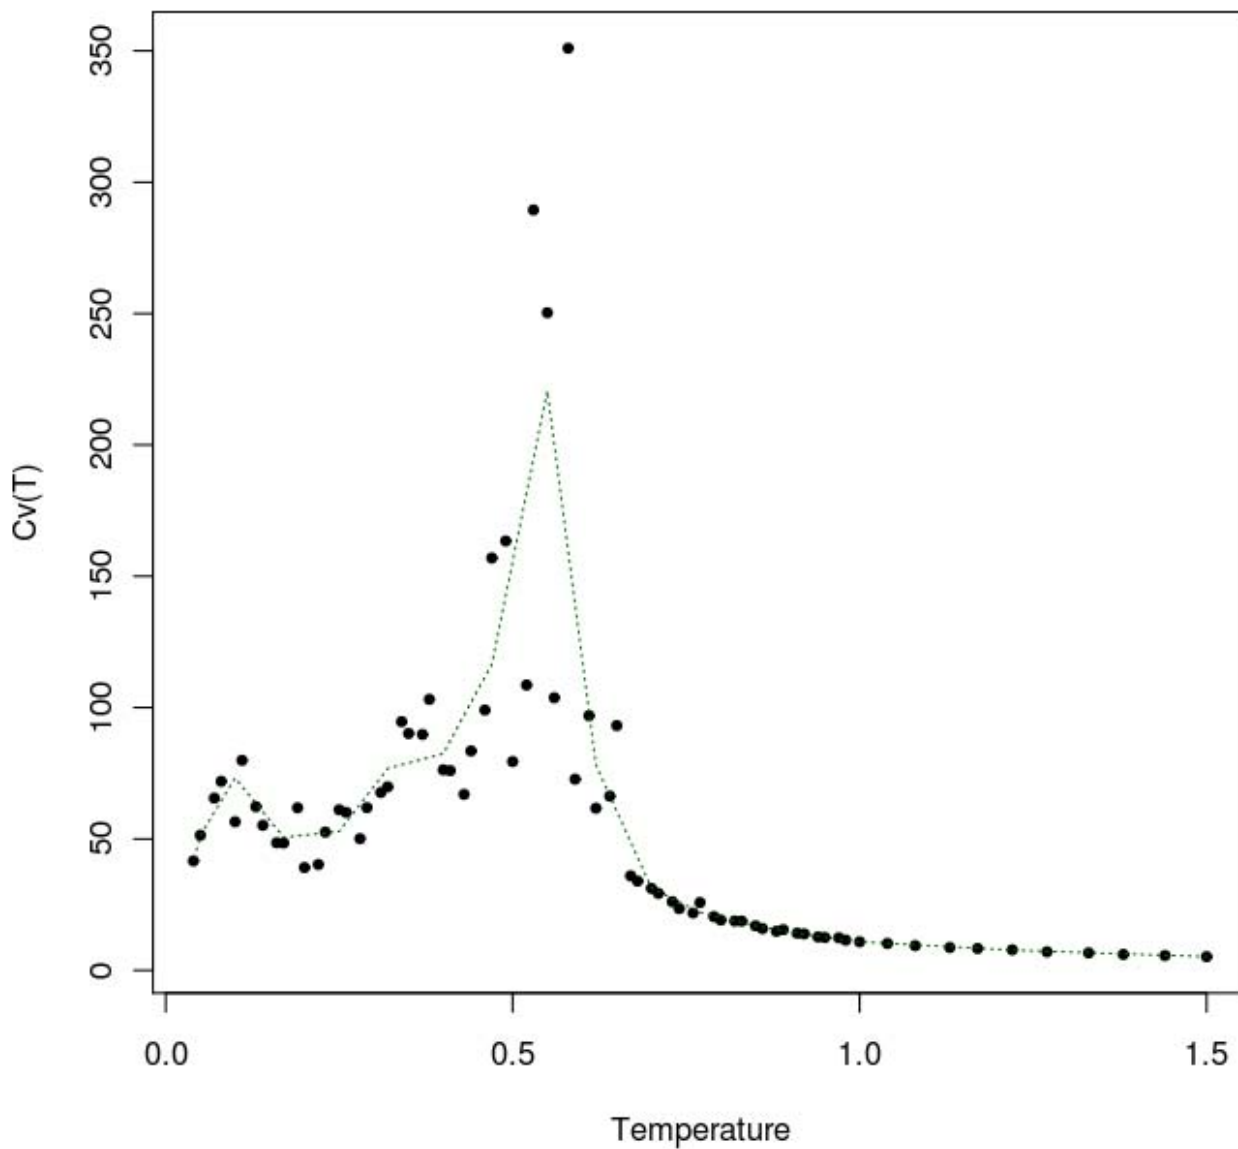

**Fig.S14.** Heat capacity as a function of temperature for concentration of mucins  $C=5\%$  and System **IV**. The dotted line represents smoothed data obtained by averaging of 5 consecutive black filled circles. The transition temperature is about 0.55.
